# Supplementary material for: A symptom-related monitoring program following pulmonary embolism for the early detection of CTEPH: a prospective observational registry study
Source: PubMed Central journal article supplement (PMC4152276; doi:10.1186/1471-2466-14-141), 2014-08-28
Supplement: 1471-2466-14-141-S1.pdf [file 1471-2466-14-141-S1.pdf]

Telefonvisite 1  
Datum

Zeitpunkt 3 Monate nach LE

|                    |  |
|--------------------|--|
| Patientenaufkleber |  |
| Laufende Nummer    |  |
| Ident-Nummer       |  |

Besteht Luftnot unter Ruhebedingungen ?

Ja                       Nein

Besteht Luftnot unter Belastungsbedingungen ?

Ja                       Nein

Besteht ein Druckgefühl im Brustkorb ?

Ja                       Nein

Abgeschätztes WHO-Funktionsstadium?

WHO I                      II                      III                      IV

Besteht Schindel?

Ja                       Nein

- Wenn ja?
- Drehschwindel ?
- Schwankschwindel ?
- „Schwarzwerden vor den Augen“?

Kam es seit der Krankenhausentlassung zu einer Bewusstlosigkeit?

Ja                       Nein

Einbestellung nötig?

Ja                       Nein                       Einbestelldatum

Bemerkung
